# Supplementary material
Source: publisher figshare collection journal article supplement (https://gsajournals.figshare.com/articles/dataset/_/16368381)

A. Gut (Gal4\*UAS)

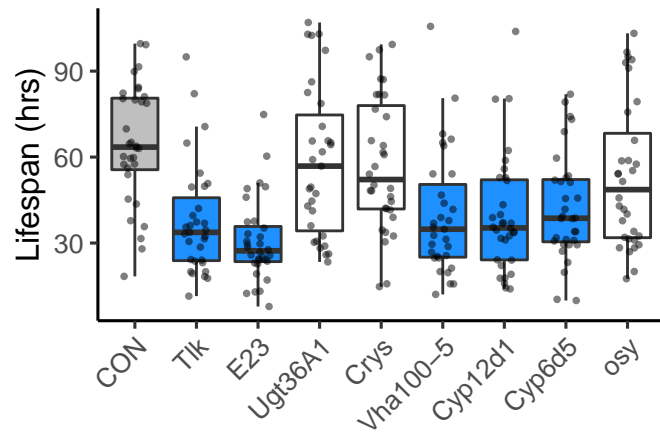

B. Ubiq (Gal4\*UAS)

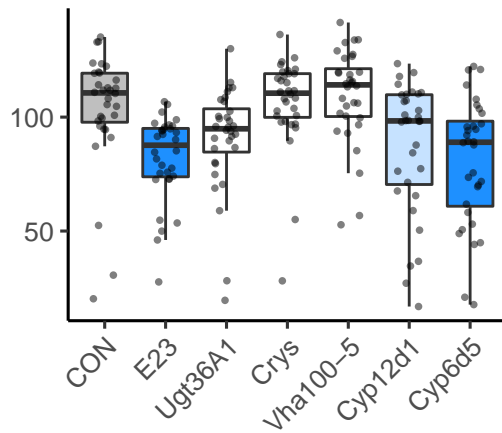

C. Gut (UAS\*Gal4)

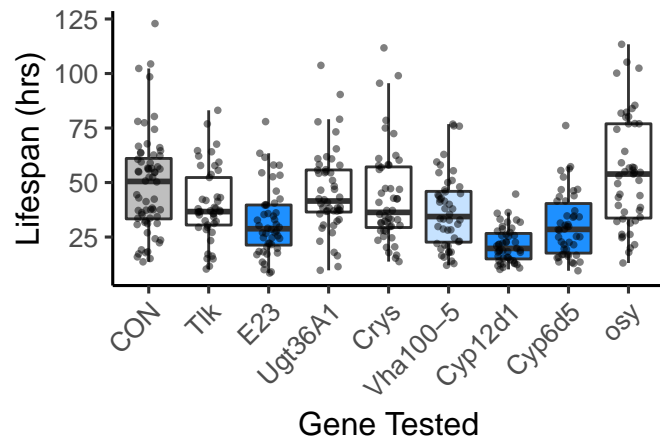

D. Ubiq (UAS\*Gal4)

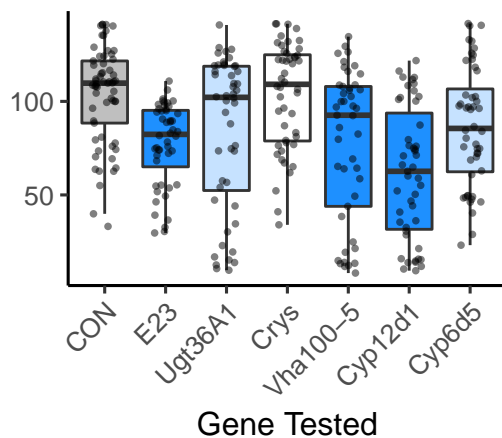

Supplement: Supplementary file 2 [file 1]
